# Supplementary material for: Determination of atenolol based on the reversion of the fluorescence resonance energy transfer between AgInS2quantum dots and Au nanoparticles
Source: Royal Society of Chemistry journal article supplement (doi:10.1039/d0an01874k), 2020-11-17
Supplement: d0an01874k1.pdf [file d0an01874k1.pdf]

**Determination of atenolol based on the reversion of the  
fluorescence resonance energy transfer between AgInS<sub>2</sub>  
quantum dots and Au nanoparticles**

Rafael C. Castro, André F. R. Lopes, José X. Soares, David S. M. Ribeiro\*, João L. M.  
Santos\*

*LAQV, REQUIMTE, Department of Chemical Sciences, Laboratory of Applied  
Chemistry, Faculty of Pharmacy, University of Porto, Rua de Jorge Viterbo Ferreira n<sup>o</sup>  
228, 4050-313 Porto, Portugal*

**Supplementary Material**

**Table S1.** Experimental conditions for the MW synthesis of D-penicillamine-capped AgInS<sub>2</sub> QDs

|                                               | <b>570 nm-AIS QDs</b> | <b>568 nm-AIS QDs</b> | <b>557 nm-AIS QDs</b> | <b>561 nm-AIS/ZnS QDs</b> |
|-----------------------------------------------|-----------------------|-----------------------|-----------------------|---------------------------|
| <b>AgNO<sub>3</sub> (μmol)*</b>               | 10                    | 7.5                   | 5                     | 10                        |
| <b>NH<sub>4</sub>OH (μmol)*</b>               | 50                    | 50                    | 50                    | 50                        |
| <b>D-Pen (μmol)*</b>                          | 150                   | 150                   | 150                   | 150                       |
| <b>InCl<sub>3</sub> (μmol)*</b>               | 100                   | 100                   | 100                   | 100                       |
| <b>Na<sub>2</sub>S.9H<sub>2</sub>O(μmol)*</b> | 125                   | 125                   | 125                   | 125                       |
| <b>Adjusted pH</b>                            | 7.5                   | 7.5                   | 7.5                   | 7.5                       |
| <b>Time 1 (min)</b>                           | 10                    | 10                    | 10                    | 10                        |
| <b>Temperature 1 (°C)</b>                     | 80                    | 80                    | 80                    | 80                        |
| <b>ZnNO<sub>3</sub> (μmol)*</b>               | n.a.                  | n.a.                  | n.a.                  | 150                       |
| <b>D- Pen (μmol)*</b>                         | n.a.                  | n.a.                  | n.a.                  | 150                       |
| <b>NH<sub>4</sub>OH(μmol)*</b>                | n.a.                  | n.a.                  | n.a.                  | 150                       |
| <b>Time 2 (min)*</b>                          | n.a.                  | n.a.                  | n.a.                  | 10                        |
| <b>Temperature 2 (°C)</b>                     | n.a.                  | n.a.                  | n.a.                  | 60                        |

\* Final volume was 25.0 mL

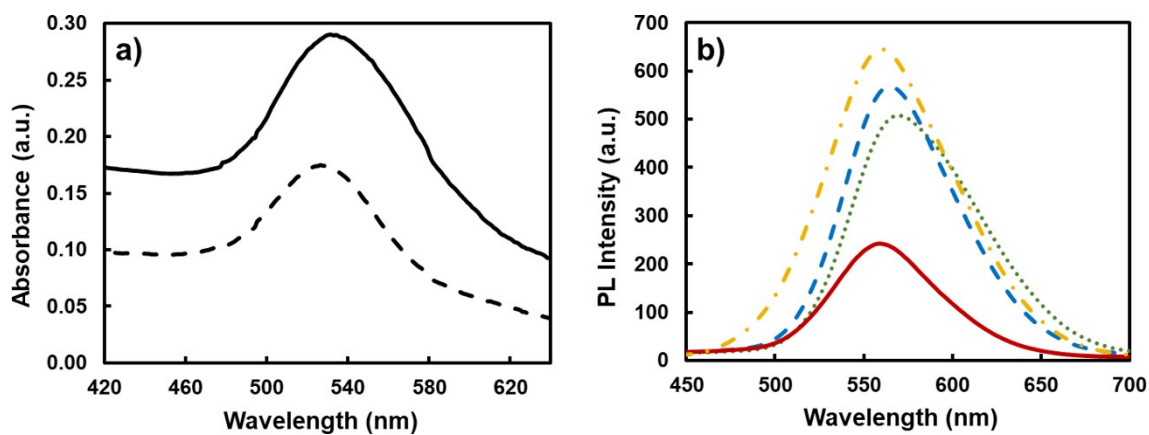

**Fig. S1.** **a)** Absorption spectra of AuNPs stabilized with cysteamine (black dashed line) and citrate (black full line). **b)** PL spectra of AIS QDs with Ag:In:S molar ratio of 0.1:1:1.25 (green dotted line), 0.075:1:1.25 (blue dashed line) and 0.05:1:1.25 (red full line) and AIS/ZnS QDs with molar ratio of 0.1:1:1.25 (orange dashed and dotted line).

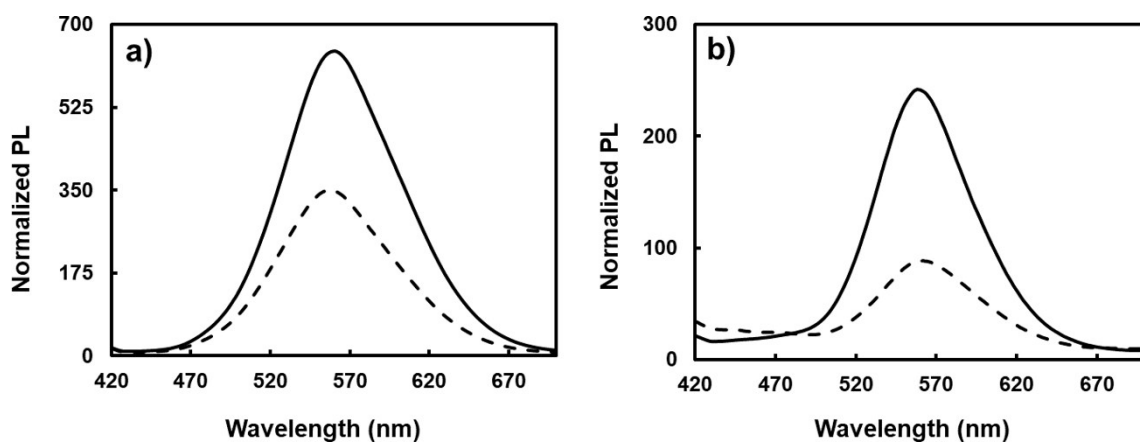

**Fig. S2.** **a)** AIS/ZnS QDs PL spectra before (full line) and after lyophilization (dashed line). **b)** PL spectra of AIS QDs before (full line) and after lyophilization (dashed line).

**Table S2.** PL inhibition of ternary QDs in the presence of different AuNPs volumes.

| % PL Inhibition   |                        |                    |                             |                         |
|-------------------|------------------------|--------------------|-----------------------------|-------------------------|
| AuNPs volume (μL) | AIS/ZnS QDs + CA-AuNPs | AIS QDs + CA-AuNPs | AIS/ZnS QDs + Citrate-AuNPs | AIS QDs + Citrate-AuNPs |
| 2.5               | 26.77                  | n.s.v.             | 2.38                        | n.s.v.                  |
| 5                 | 38.89                  | n.s.v.             | 6.49                        | n.s.v.                  |
| 10                | 53.07                  | 7.6                | 10.63                       | n.s.v.                  |
| 15                | 60.72                  | -                  | 21.78                       | n.s.v.                  |
| 20                | 71.01                  | 23.45              | 22.22                       | n.s.v.                  |
| 25                | 81.11                  | -                  | 24.06                       | n.s.v.                  |
| 30                | 83.7                   | 26.38              | 26.99                       | n.s.v.                  |
| 40                | -                      | 39.12              | 35.06                       | n.s.v.                  |
| 50                | -                      | 38.37              | 38.15                       | n.s.v.                  |
| 60                | -                      | 41.35              | -                           | n.s.v.                  |
| 70                | -                      | 46.89              | -                           | n.s.v.                  |
| 80                | -                      | -                  | 49.7                        | n.s.v.                  |
| 100               | -                      | -                  | 66.02                       | 5.37                    |
| 150               | -                      | 57.68              | -                           | -                       |
| 200               | -                      | 64.43              | -                           | 18.7                    |
| 300               | -                      | 72.92              | -                           | 34.84                   |
| 400               | -                      | -                  | -                           | 44.54                   |
| 500               | -                      | -                  | -                           | 54.49                   |

\* n.s.v. - no significant variation

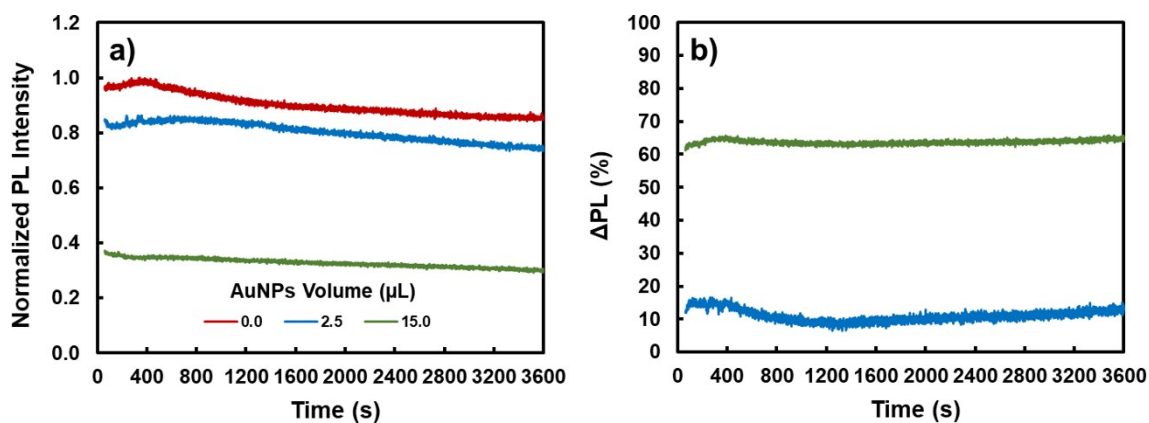

**Fig. S3.** **a)** Assessment of stability of QDs PL intensity in absence and presence of AuNPs at two different concentration levels. **b)** Monitoring of PL inhibition rate of the FRET process between AIS/ZnS QDs and 2.5  $\mu\text{L}$  (blue line) and 15.0  $\mu\text{L}$  (green line) cysteamine-AuNPs.

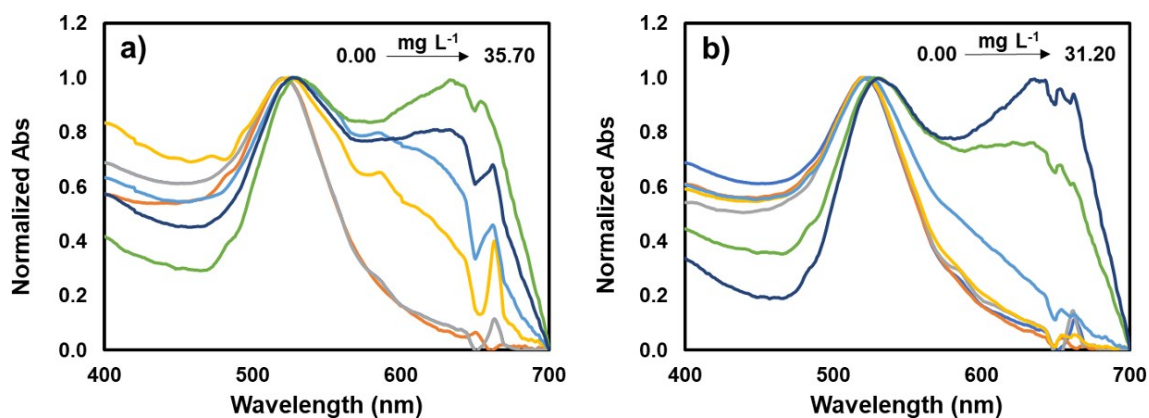

**Fig. S4.** Normalized absorbance spectra of CA-AuNPs in the absence and presence of increasing concentration of  $\beta$  blockers drugs: **a)** atenolol; and **b)** nadolol.
